# Supplementary material for: Soil solution phosphorus turnover: derivation, interpretation, and insights from a global compilation of isotope exchange kinetic studies
Source: Copernicus journal article supplement (doi:10.5194/bg-15-105-2018), 2018-01-08
Supplement: Supplementary file [file bg-15-105-2018-supplement-title-page.pdf › bg-15-105-2018-supplement-title-page.pdf]

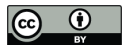

## *Supplement of*

# **Soil solution phosphorus turnover: derivation, interpretation, and insights from a global compilation of isotope exchange kinetic studies**

**Julian Helfenstein et al.**

*Correspondence to:* Julian Helfenstein ([julian.helfenstein@usys.ethz.ch](mailto:julian.helfenstein@usys.ethz.ch))

- [bg-15-105-2018-supplement-title-page.pdf](#)
- Biogeosciences supplement
  - .DS\_Store
  - Supplements.pdf
  - dataset\_fertilizerexperiments.csv
  - dataset\_soils.csv

The copyright of individual parts of the supplement might differ from the CC BY 4.0 License.
